# Supplementary material
Source: PubMed Central journal article supplement (PMC299976)
Supplement: pnas_100_25_15253__6.pdf [file pnas_100_25_15253__6.pdf]

td<sub>lgal</sub> M A P C L V S A S T C A M G S G L L T K L E T M L D D E Y . I L L V V R R D I K F V I H E L A M W Q F F L L D V A D T E S 59  
td<sub>rgal</sub> M A P C L V S A S T C A M G S G L L T K L E T M L D D E Y . I L L V V R R D I K F V I H E L A M W Q F F L L D V A D T E S 58  
can<sub>rgal</sub> M A P C R V S A S T C A M G S G L L T K L E T M L D D E Y . K L L G A F R R D I F V I H E L A M I W Q S F L L N V A D T E S 60  
td<sub>lgal</sub> M A P C R V S A S T C A M G S G L L T K L E T M L D D E Y M L L L V R R D I N I H D B D K Y M S G F L L N V A D T E S 60

td<sub>lgal</sub> P Q C H D K S C A D L V R E L S Y D I E D K I D N S M S L M L L R H A C P N S G I K K H M S K P K N I L P V K I P Y Q I A 119  
td<sub>rgal</sub> P Q C H D K S C A D L V R E L S Y D I E D K I D N S M S L M L L R H A C P N S G I K K H M S K P K N I L P V K I P Y Q I A 118  
can<sub>rgal</sub> P E E F H S R A D F V R E L S Y D I E D E I D N M P L M L L H A I V Y S N S C F K K H M S K P K N I L P V K I P Y Q I A 120  
td<sub>lgal</sub> P Q C H D K S R A D F V R E L S Y D I E D K I D N M P L M L L R H A I V Y S N S C F K K H M S K P K N I L P V K I P Y Q I A 120

N-term.

td<sub>lgal</sub> K D I K D I K S Q I L E V N S R C R Y R . . . R F E . . . D V C L A R T E F V D P R L C T V D T C A A D L V G I D 170  
td<sub>rgal</sub> K D I K D I K S Q I L E V N S R C R Y R . . . R F E . . . D V C L A R T E F V D P R L C T V D T C A A D L V G I D 169  
can<sub>rgal</sub> K D I K D I K S Q I L E V N S R C R Y R . . . R G G N R F E R Y M . . . D V C P A R T E F V D P R L C T V D T C A A D L V G I D 180  
td<sub>lgal</sub> K D I K D I K S Q I S E R G Y R R R Y R . . . R . . . V E D V C P A R T E F V D P R L C T V D T C A A D L V G I D 171

td<sub>lgal</sub> G P K H E L V K W L R N G E D S V H Q Q K V V S I V G C A G L G K T T L A K Q V Y D E L R I N F E Y R A F V S I S R S 230  
td<sub>rgal</sub> G P K H E L V K W L R N G E D S V H Q Q K V V S I V G C A G L G K T T L A K Q V Y D E L R I N F E Y R A F V S I S R S 229  
can<sub>rgal</sub> G P K V E L V K W L R N G E D S . . . Q K V V S I V G C A G L G K T T L A K Q V Y D E L R I N F E Y R A F V S I S R S 236  
td<sub>lgal</sub> G P K V E L V K W L R N G E D S . . . Q K V V S I V G C A G L G K T T L A K Q V Y D E R I N F E Y R A F V S I S R S 227

td<sub>lgal</sub> D M A T I L K C V L S O P H A Q O Y S S D E S H I P K L V D Q R R D L Q D L Y P F V I I D D I W D M K T W D V L K C 288  
td<sub>rgal</sub> D M A T I L K C V L S O P H A Q O Y S S D E S H I P K L V D Q R R D L Q D K R Y P F V I I D D I W D M K T W D V L K C 289  
can<sub>rgal</sub> D M A T I L K C V L S O P H A Q O Y S S D E I T E P K K I N Q I R D L F L Q D K R Y P F V I I D D I W D M K T W V L K C 287

NBS

td<sub>lgal</sub> A L C K N S C G S V I M T T T R I Y D V A K S C C S S N G D L V N Y I Q P L S V A D S E S L F L N R V F G H E K C F P P 348  
td<sub>rgal</sub> A L C K N S C G S V I M T T T R I Y D V A K S C C S S N G D L V N Y I Q P L S V A D S E S L F L N R V F G H E K C F P P 349  
can<sub>rgal</sub> A L C K N S C G S V I M T T T R I Y D V A K S C C S S N G D L V N Y I R P L S V A D S E S L F L N R V F G H E K C F P P 356  
td<sub>lgal</sub> A L C K N S C G S V I M T T T R I Y D V A K L C C S S D G D L V N Y I R P L S V A D S E S L F L N R V F G H E K C F P P 347

td<sub>lgal</sub> E L K E V S K D V L R K C C G L P L A I N A I S S L L A A S K . L E B W D R V G L S N V F A Q G E K S D I D A M K Y I L 407  
td<sub>rgal</sub> E L K E V S K D V L R K C C G L P L A I N A I S S L L A A S K . L E B W D R V G L S N V F A Q G E K S D I D A M K Y I L 408  
can<sub>rgal</sub> E L K E V S K D V L R K C C G L P L A I N A I S S L L A A S E N L E B W H V G L S S F V L V R G S E S D I D A M K Y I L 416  
td<sub>lgal</sub> E L K E V S K D V L R K C C G L P L A I N A I S S L L A A S E N L E B W H V G L S S F V L V R G S E S D I D A M K Y I L 407

td<sub>lgal</sub> S C Y F D L P P D L R R S C L L Y I A M F P E D C L I E K S R L V H R W I S E G F I R N E D C E D I V B V G E Y L Y E 467  
td<sub>rgal</sub> S C Y F D L P P D L R R S C L L Y I A M F P E D C L I E K S R L V H R W I S E G F I R N E D C E D I V B V G E Y L Y E 468  
can<sub>rgal</sub> S S Y F D L P P D L R R S C L L Y I A M F P E D C L I E K S R L V H R W I S E G F I R N E D C E D I V B V G E Y L Y E 476  
td<sub>lgal</sub> S C Y F D L P P D L R R S C L L Y I A M F P E D C L I E K S R L V H R W I S E G F I R N E A G L C I V B V G E Y L Y E 467

td<sub>lgal</sub> L V N R S L I E S V G V P Y D G K A R F Y R V H N V I L D F L M K S M E E N F C T L T N Q S R L D Y K V R R L S L F 527  
td<sub>rgal</sub> L V N R S L I E S V G V P Y D G K A R F Y R V H N V I L D F L M K S M E E N F C T L T N Q S R L D Y K V R R L S L F 528  
can<sub>rgal</sub> L V N R S L I E S V G V P Y D G K A R F Y R V H N V I L D F L M K S M E E N F C T L T N Q S R L D Y K V R R L S L F 536  
td<sub>lgal</sub> L V N R S L I E S V G V P Y D R K A R F Y R V H N V I L D F L I F K S M E E N F C T L T S D Q S R L D Y K V R R L S L F 527

Spacer

td<sub>lgal</sub> A N K D P S C I A Q L D L S H A R S L G A S C H L Q Q L I S S V K S N A R L V L D V Q D C S E L G N H H V K D I C R N P 587  
td<sub>rgal</sub> A N K D P S C I A Q L D L S H A R S L G A S C H L Q Q L I S S V K S N A R L V L D V Q D C S E L G N H H V K D I C R N P 598  
can<sub>rgal</sub> A N K D P S C I A Q L D L S H A R S L G A F C H L Q Q S L S S V K S N A L L V L D I Q D C S E L G N H H V K D I C R N P 586  
td<sub>lgal</sub> A N K D P S C I A Q L D L S H A R S L G A F C H L Q Q S L S S V K S N A L L V L D I Q D C S E L G N H H V K D I C R N P 587

td<sub>lgal</sub> L R Y L N I S C T D V E F L P I Q I G D M C P F L T L D A S F F B L V M P Q S I T R L R Q L Q R L F V S D E T K L P 647  
td<sub>rgal</sub> L R Y L N I S C T D V E F L P I Q I G D M C P F L T L D A S F F B L V M P Q S I T R L R Q L Q R L F V S D E T K L P 648  
can<sub>rgal</sub> L R Y L N I S C T D V T E F L P I Q I G D M C P F L T L D A S F F B L V M P Q S I T R L R Q L Q R L F V S D E T K L P 656  
td<sub>lgal</sub> L L T Y L N I S C T D V E F L P I Q I A D M C P F L T L D A S F F B L I V E P R A L T C L R Q Q V R L F V S D E T K L P 647

td<sub>lgal</sub> D B I G N M K R L Q B L G D I N A P K Q S V N F N E L G K L T G L R K L G I I W D T N D I L K S G K G S K E K R L V 707  
td<sub>rgal</sub> D B I G N M K R L Q B L G D I N A P K Q S V N F N E L G K L T G L R K L G I I W D T N D I L K S G K G S K E K R L V 708  
can<sub>rgal</sub> D B I G N M K R L Q B L G D I N A P K Q S V N F N E L G K L T G L R K L G I I W D T N D I L K S G K G S K E K R L V 716  
td<sub>lgal</sub> D B I G N M K R L Q B L G D I N A P K Q S V N F N E L G K L T G L R K L G I I W D T N D I L K S G K G S K E K R L V 707

LRR

td<sub>lgal</sub> S S L S K L D A C R L S N L Y V T P Y L R E K D C P I C H P F L P A L N S T R E V Y L R R G R M C W M N K W L L S L A N 767  
td<sub>rgal</sub> S S L S K L D A C R L S N L Y V T P Y L R E K D C P I C H P F L P A L N S T R E V Y L R R G R M C W M N K W L L S L A N 768  
can<sub>rgal</sub> S S L S K L D A C R L S N L Y V T P Y L R E K D C P I C H P F L P A L N S T R E V Y L R R G R M C W M N K W L L S L A N 776  
td<sub>lgal</sub> S S L S K L D A C R L S N L Y V T P Y L R E K D C P I C H P F L P A L N S T R E V Y L R R G R M C W M N K W L L S L A N 767

td<sub>lgal</sub> L B K L Y I S G C D L B I E Q D D L R T V G S I P T L V E F K L Y S G C L C P I I T S S G F E Q L E R L B L K F S F S Q L 827  
td<sub>rgal</sub> L B K L Y I S G C D L B I E Q D D L R T V G S I P T L V E F K L Y S G C L C P I I T S S G F E Q L E R L B L K F S F S Q L 828  
can<sub>rgal</sub> L B K L Y I S G C D L B I E Q D D L R T V G S I P T L V E F K L Y S G C L C P I I T S S G F E Q L E R L B L K F S F S Q L 836  
td<sub>lgal</sub> L B K L Y I S G C D L B I E Q D D L R T V G S I P T L V E F K L Y S G C L C P I I T S S G F E Q L E R L B L K F S F S Q L 827

td<sub>lgal</sub> T P E V G A M P N L K K I D L H V Y L S K F K S A G A G P D F G Q H L S S L A C V S I V I P C E G V S A A Y V B A A E 887  
td<sub>rgal</sub> T P E V G A M P N L K K I D L H V Y L S K F K S A G A G P D F G Q H L S S L A C V S I V I P C E G V S A A Y V B A A E 886  
can<sub>rgal</sub> T P E V G A M P N L K K I D L H V Y L S K F K S V G A G P D F G Q H L S S L A C V S I V I P C E G V S A A Y V B A A E 898  
td<sub>lgal</sub> T P E V G A M P N L K K I D L H V Y L S K F K S V G A G P D F G Q H L S S L A C V S I V I P C E G V S A A Y V B A A E 887

td<sub>lgal</sub> G A F K S M V N A H P N P N R P M L E M T R E S A D F M S Q D B E 919  
td<sub>rgal</sub> G A F K S M V N A H P N P N R P M L E M T R E S A D F M S Q D B E 920  
can<sub>rgal</sub> G A F K S M V N A H P N P N R P M L E M T R E S A D F M S Q D B E 928  
td<sub>lgal</sub> G A F K S M V N A H P N P N R P M L E M T R E S A D F M S Q D B E 919
