# Supplementary material
Source: PubMed Central journal article supplement (PMC299976)

**A**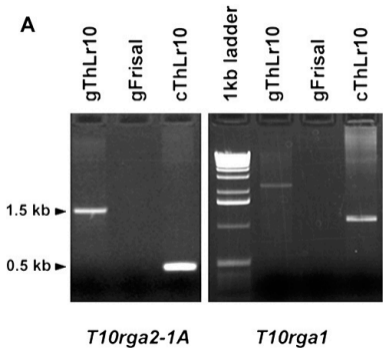**B**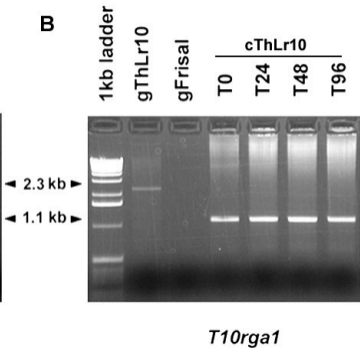

Supplement: pnas_100_25_15253__2.pdf [file pnas_100_25_15253__2.pdf]

0.5 kb 

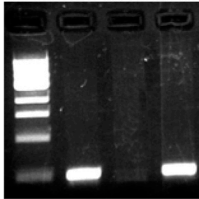

**ThLr10**

**Frisal**

**Can3842**

Supplement: pnas_100_25_15253__4.pdf [file pnas_100_25_15253__4.pdf]
